# Supplementary material
Source: PubMed Central journal article supplement (PMC6586234)
Supplement: NIHMS1517937-supplement-1.pdf [file NIHMS1517937-supplement-1.pdf]

Figure S1

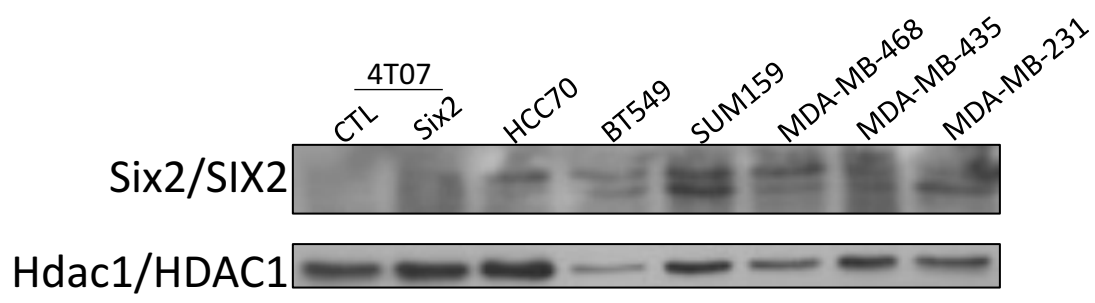

**Supplemental Figure 1. Levels of Six2 OE in 4T07 cells is comparable to levels in multiple other human TNBC cell lines with relatively high endogenous Six2 expression.** Western blot analysis showing the level of Six2 OE in 4T07 cells compared to other human TNBC cell lines. Lines were determined to be TNBC cell lines via the ATCC database. HDAC1 was used as a loading control.
