# Supplementary material
Source: PubMed Central journal article supplement (PMC6586234)
Supplement: NIHMS1517937-supplement-5.pdf [file NIHMS1517937-supplement-5.pdf]

Figure S5

A.

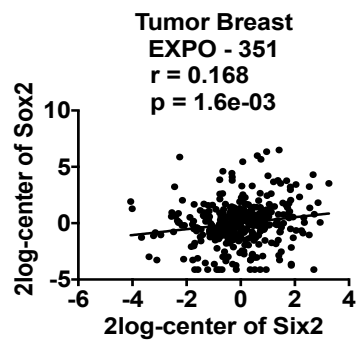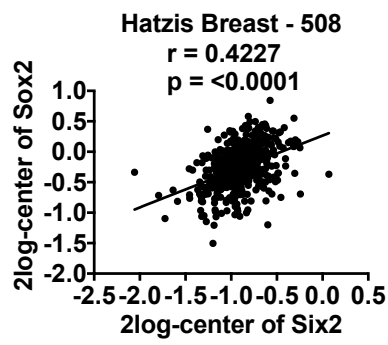

B.

Six2 Gene Signature

| Gene Symbol | FC (Six2/CTL) |
|-------------|---------------|
| HSPB1       | 302.3         |
| NOS1        | 25.7          |
| CHRM3       | 24.5          |
| MID2        | 17.1          |
| CDH19       | 12.5          |
| EFS         | 12.3          |
| TP53I11     | 11.7          |
| TSPAN12     | 11.6          |
| PLCL1       | 11.4          |
| COL9A1      | 10.8          |
| NDP         | 10.7          |
| SLC28A2     | 10.5          |
| PPARGC1A    | 9.4           |
| CYP7B1      | 9.0           |
| GRIK2       | 8.5           |

**Supplemental Figure 5: Six2 and Sox2 mRNA positively correlate in breast cancer patient samples and upregulates genes associated with stemness and poorer prognosis. A)**

Linear regression analyses demonstrate significant positive correlation between *Six2* and *Sox2* in Hatzis and Tumor Breast EXPO - 351 datasets via R2 Database. B) List of top 15 upregulated genes in response to Six2 OE (Six2 Gene Signature). Genes were chosen based on significant fold change and were converted from mouse to human gene symbols.
