# Supplementary material
Source: PubMed Central journal article supplement (PMC6586234)
Supplement: NIHMS1517937-supplement-6.pdf [file NIHMS1517937-supplement-6.pdf]

Figure S6

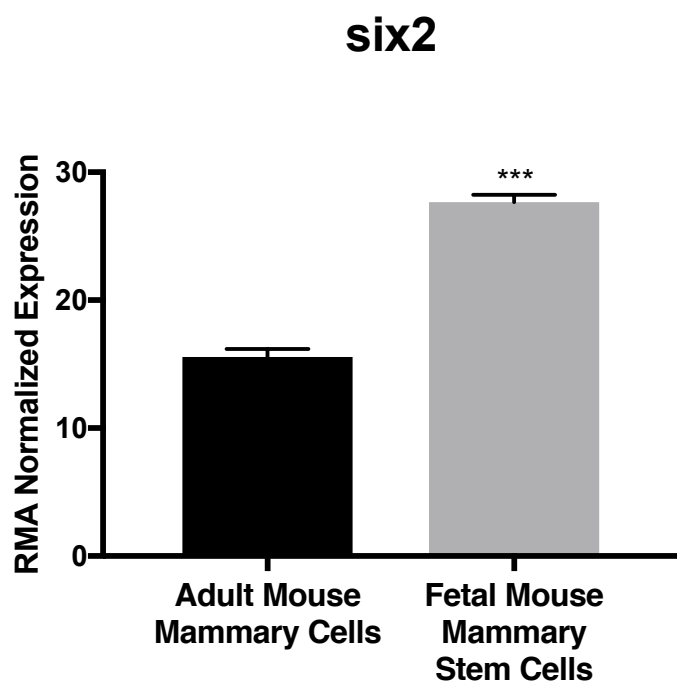

**Supplemental Figure 6: Six2 is more highly expressed in the fetal mammary stem cell population compared to adult mouse mammary cells.** mRNA expression of *six2* in normal adult mouse mammary cells and normal fetal mouse mammary stem cells (fMaSC). RNA-seq data was obtained from GSE27027 (Spike *et al.*, 2012)
